# Supplementary material for: Allele-Specific Knockout by CRISPR/Cas to Treat Autosomal Dominant Retinitis Pigmentosa Caused by the G56R Mutation in NR2E3
Source: PubMed Central journal article supplement (PMC7961898; doi:10.3390/ijms22052607), 2021-03-05
Supplement: ijms-22-02607-s001.pdf [file ijms-22-02607-s001.pdf]

**Table S1.** Sequences of the primers used in this study.

| <b>Target</b>                | <b>Forward Primer</b>                         | <b>Reverse Primer</b>                         |
|------------------------------|-----------------------------------------------|-----------------------------------------------|
| <b>NR2E3</b>                 |                                               |                                               |
| cDNA amplification           | 5' GG GCA CAG AGA GAC AGA GGT TC 3'           | 5' GCT AGC ATT TCA CCT CCA CCC CCA 3'         |
| Exon 2 sequencing            | 5' GTT CAA ATG CGG GTG AGC 3'                 | 5' GTC AGT GTC CCT CCC ATG C 3'               |
| T7E1 assay                   | 5' GCC TGA GGA CTG GGA AAG G 3'               | 5' CAC CGC ACT CAC CTG TAG AT 3'              |
| <b>gRNA oligonucleotides</b> |                                               |                                               |
| gRNA1                        | 5' cacc AGC AGC AGC AGG AAG CAC TA 3'         | 5' aaac TAG TGC TTC CTG CTG CTGC T 3'         |
| gRNA2                        | 5' cacc GTG CGG AGA CAG CAG CAG CA 3'         | 5' aaac TGC TGC TGC TGT CTC CGC AC 3'         |
| <b>Off-target genes</b>      |                                               |                                               |
| <i>ESRRB</i>                 | 5' CAT CAA GAC TGA GCC GTC CA 3'              | 5' ACC ACG CAC CTT GGA TAG TC 3'              |
| <i>GPR135 GD</i>             | 5' ACA ACT GGA TTT TTG CGG GC 3'              | 5' TGG ACC GTT ACT GCG CTA TC 3'              |
| <i>SOX17</i>                 | 5' TTT TCG AAC GAC CGG GTGA T 3'              | 5' ATC TCA GGC TTG CAC ACG AA 3'              |
| <i>RP1-37C10.3</i>           | 5' TGA CAA GCA AAC CCC GTG TA 3'              | 5' CCT ACA GAA GGC TGA CGG AC 3'              |
| <i>NPEPL1/STX16-NPEPL1</i>   | 5' CTC CCT GGA TCC ACC CCT TA 3'              | 5' TTG TCT CGG TCC TAG GGA GG 3'              |
| <i>TSPAN4</i>                | 5' GAC TTG GGA CCA GAA CCC TG 3'              | 5' CTG GTA AAT CCA CAC CCG CT 3'              |
| <i>SLC39A4</i>               | 5' GCA GGC AGG GTC TCC ATA TC 3'              | 5' CTC CTC TTC CTG CTG CAC AA 3'              |
| <i>TBX5-AS1</i>              | 5' TCC CAC CGA ATG CTC TCA AC 3'              | 5' AAC AGG AGG CGT TGG GTT AG 3'              |
| <i>FAM69B/SNHG7</i>          | 5' GCG GGA CAA GGA TGT AAC CA 3'              | 5' CAG GTC GGC CAT CTT GAA GT 3'              |
| <i>PDLIM7</i>                | 5' CAC CCC AAA TGC AAA CCA GG 3'              | 5' GTC TAC TCC TGA GGC TCC CA 3'              |
| <b>Mutagenesis primers</b>   |                                               |                                               |
| WT to G56R                   | 5' GAG ACA GCA GCA GCA GGA AGC ACT ATG G 3'   | 5' GCC ATA GTG CTT CCT GCT GCT GCT GTC TC 3'  |
| G56R to G56R-CRISPR2         | 5' GCA GCA GCA GGA AGC TAT GGC ATC TAT GCC 3' | 5' GGC ATA GAT GCC ATA GCT TCC TGC TGC TGC 3' |

**Table S2.** List of the primary antibodies used in this study.

| <b>Antibodies</b>              | <b>Host</b> | <b>Dilution</b> | <b>Company; Catalogue Number</b>       | <b>Location/Distributor</b>                        |
|--------------------------------|-------------|-----------------|----------------------------------------|----------------------------------------------------|
| <b>IF studies</b>              |             |                 |                                        |                                                    |
| <i>Pluripotency markers</i>    |             |                 |                                        |                                                    |
| NANOG                          | rabbit      | 1/200           | Abcam; ab21624                         | Paris, France                                      |
| OCT3/4                         | mouse       | 1/200           | Santa Cruz Biotechnology; sc-5279      | Heidelberg, Germany                                |
| SOX2                           | rabbit      | 1/200           | ThermoFisher Scientific; 48-1400       | Villebon sur Yvette, France                        |
| <i>Differentiation markers</i> |             |                 |                                        |                                                    |
| AFP                            | mouse       | 1/200           | Sigma-Aldrich; WH0000174M1M; clone 1G7 | St. Quentin Fallavier, France                      |
| SMA                            | mouse       | 1/200           | Dako; M0851                            | Les Ulis, France                                   |
| Nestin                         | mouse       | 1/200           | Novus Biologicals; NBP1-92717          | Lille, France                                      |
| GFAP                           | rabbit      | 1/200           | Dako; Z0334                            | Les Ulis, France                                   |
| <i>Retinal Organoids</i>       |             |                 |                                        |                                                    |
| NR2E3                          | mouse       | 1/150           | R&D Systems; PP-H7223-00; clone H7223  | Bio-Techne SAS, Noyal Châtillon sur Seiche, France |
| OTX2                           | goat        | 1/100           | R&D Systems; AF1979                    | Bio-Techne SAS                                     |
| CRX                            | mouse       | 1/2000          | Abnova; H00001406-M02                  | Paris, France                                      |
| NRL                            | goat        | 1/150           | R&D Systems; AF2945                    | Bio-Techne SAS                                     |
| <b>Western blot analyses</b>   |             |                 |                                        |                                                    |
| NR2E3 (monoclonal)             | mouse       | 1/2000          | R&D Systems; PP-H7223-00; clone H7223  | Bio-Techne SAS                                     |
| NR2E3 (polyclonal)             | rabbit      | 1/2000          | Proteintech; 14246-1-AP                | Manchester, UK                                     |
| $\beta$ -tubulin               | rabbit      | 1/5000          | Cell Signaling Technology; 2128        | Ozyme, Saint Cyr L'Ecole, France                   |
| $\beta$ -actin                 | mouse       | 1/5000          | Sigma Aldrich; A5316                   | St. Quentin Fallavier, France                      |
| Histone H3                     | mouse       | 1/1000          | Millipore; 06-755                      | St. Quentin en Yvelines, France                    |

**Table S3.** List of secondary antibodies used in this study.

| <b>Antibodies</b>                      | <b>Host</b> | <b>Dilution</b> | <b>Company; Catalogue number</b>    | <b>Distributor/Location</b> |
|----------------------------------------|-------------|-----------------|-------------------------------------|-----------------------------|
| <b>IF studies</b>                      |             |                 |                                     |                             |
| Alexa Fluor 488-conjugated anti-mouse  | donkey      | 1/500           | Jackson ImmunoResearch; 715-546-151 | Cambridgeshire, UK          |
| Alexa Fluor 647-conjugated anti-rabbit | donkey      | 1/500           | Jackson ImmunoResearch; 711-606-152 | Cambridgeshire, UK          |
| Alexa Fluor® 594-conjugated anti-goat  | donkey      | 1/500           | Jackson ImmunoResearch; 705-586-147 | Cambridgeshire, UK          |
| <b>Western blot analyses</b>           |             |                 |                                     |                             |
| IRDye 800CW anti-Rabbit                | donkey      | 1/20 000        | Li-Cor Biotechnology; 926-3221      | Bad Homburg, Germany        |
| IRDye 680RD anti-mouse                 | goat        | 1/20 000        | Li-Cor Biotechnology; 926-68070     | Bad Homburg, Germany        |

|                           |                                                           |
|---------------------------|-----------------------------------------------------------|
| <b><i>hNR2E3</i> gene</b> | <b>GCCGCGTGTGCGGAGACAGCAGCAGCGGGAAGCACTATGGCATCTATGCC</b> |
| CRISPR2 colony 1          | GCCGCGTGTGCGGAGACAGCAGCAGCAAGGAAGC--TATGGCATCTATGCC       |
| CRISPR2 colony 2          | GCCGCGTGTGCGGAGACAGCAGCAGCAAGGAAGC--TATGGCATCTATGCC       |
| CRISPR2 colony 3          | GCCGCGTGTGCGGAGACAGCAGCAGCGGGAAGCACTATGGCATCTATGCC        |
| CRISPR2 colony 4          | GCCGCGTGTGCGGAGACAGCAGCAGCAAGGAAGC--TATGGCATCTATGCC       |
| CRISPR2 colony 5          | GCCGCGTGTGCGGAGACAGCAGCAGCGGGAAGCACTATGGCATCTATGCC        |
| CRISPR2 colony 6          | GCCGCGTGTGCGGAGACAGCAGCAGCAAGGAAGC--TATGGCATCTATGCC       |
| CRISPR2 colony 7          | GCCGCGTGTGCGGAGACAGCAGCAGCGGGAAGCACTATGGCATCTATGCC        |
| CRISPR2 colony 8          | GCCGCGTGTGCGGAGACAGCAGCAGCAAGGAAGC--TATGGCATCTATGCC       |
| CRISPR2 colony 9          | GCCGCGTGTGCGGAGACAGCAGCAGCGGGAAGCACTATGGCATCTATGCC        |
| CRISPR2 colony 10         | GCCGCGTGTGCGGAGACAGCAGCAGCGGGAAGCACTATGGCATCTATGCC        |
| <br>                      |                                                           |
| <b><i>hNR2E3</i> gene</b> | <b>GCCGCGTGTGCGGAGACAGCAGCAGCGGGAAGCA-CTATGGCATCTATGC</b> |
| CRISPR3 colony 1          | GCCGCGTGTGCGGAGACAGCAGCAGCGGGAAGCA-CTATGGCATCTATGC        |
| CRISPR3 colony 2          | GCCGCGTGTGCGGAGACAGCAGCAGCAAGGAAGCAACTATGGCATCTATGC       |
| CRISPR3 colony 3          | GCCGCGTGTGCGGAGACAGCAGCAGCAAGGAAGCAACTATGGCATCTATGC       |
| CRISPR3 colony 4          | GCCGCGTGTGCGGAGACAGCAGCAGCAAGGAAGCAACTATGGCATCTATGC       |
| CRISPR3 colony 5          | GCCGCGTGTGCGGAGACAGCAGCAGCAAGGAAGCAACTATGGCATCTATGC       |
| CRISPR3 colony 6          | GCCGCGTGTGCGGAGACAGCAGCAGCGGGAAGCA-CTATGGCATCTATGC        |
| CRISPR3 colony 7          | GCCGCGTGTGCGGAGACAGCAGCAGCGGGAAGCA-CTATGGCATCTATGC        |
| CRISPR3 colony 8          | GCCGCGTGTGCGGAGACAGCAGCAGCAAGGAAGCAACTATGGCATCTATGC       |
| CRISPR3 colony 9          | GCCGCGTGTGCGGAGACAGCAGCAGCAAGGAAGCAACTATGGCATCTATGC       |
| CRISPR3 colony 10         | GCCGCGTGTGCGGAGACAGCAGCAGCGGGAAGCA-CTATGGCATCTATGC        |

**Figure S1.** Sequence alignment of the sub-cloned G56R-CRISPR2/3 alleles from 10 bacterial colonies. The top line of each alignment (in bold) shows the reference human *NR2E3* sequence. The c.166G nucleotide is in green. The c.166G>A transition in the mutant alleles is shown in red. Positions of indels (CA deletion in G56R-CRISPR2, and A insertion in G56R-CRISPR3) are indicated by dashes.

## **ESRRB**

ESRRB\_WT 1 ATGTTTGCAGGCGCCGGGCTGGGAGGCACCCCATGCCGCAAGAGCTACGAGGACTGTGCC  
ESRRB\_G56R 1 ATGTTTGCAGGCGCCGGGCTGGGAGGCACCCCATGCCGCAAGAGCTACGAGGACTGTGCC  
ESRRB\_CRISPR2 1 ATGTTTGCAGGCGCCGGGCTGGGAGGCACCCCATGCCGCAAGAGCTACGAGGACTGTGCC  
ESRRB\_CRISPR3 1 ATGTTTGCAGGCGCCGGGCTGGGAGGCACCCCATGCCGCAAGAGCTACGAGGACTGTGCC  
ESRRB\_CRISPR4 1 ATGTTTGCAGGCGCCGGGCTGGGAGGCACCCCATGCCGCAAGAGCTACGAGGACTGTGCC

ESRRB\_WT 61 AGCGGCATCATGGAGGACTCGGCCATCAAGTGCAGTACATGCTCAACGCCATCCCCAAG  
ESRRB\_G56R 61 AGCGGCATCATGGAGGACTCGGCCATCAAGTGCAGTACATGCTCAACGCCATCCCCAAG  
ESRRB\_CRISPR2 61 AGCGGCATCATGGAGGACTCGGCCATCAAGTGCAGTACATGCTCAACGCCATCCCCAAG  
ESRRB\_CRISPR3 61 AGCGGCATCATGGAGGACTCGGCCATCAAGTGCAGTACATGCTCAACGCCATCCCCAAG  
ESRRB\_CRISPR4 61 AGCGGCATCATGGAGGACTCGGCCATCAAGTGCAGTACATGCTCAACGCCATCCCCAAG

ESRRB\_WT 121 CGCCTGTGCCTCGTGTGCGGGGACATTGCCTCTGGCTACCACTACGGCGTGG  
ESRRB\_G56R 121 CGCCTGTGCCTCGTGTGCGGGGACATTGCCTCTGGCTACCACTACGGCGTGG  
ESRRB\_CRISPR2 121 CGCCTGTGCCTCGTGTGCGGGGACATTGCCTCTGGCTACCACTACGGCGTGG  
ESRRB\_CRISPR3 121 CGCCTGTGCCTCGTGTGCGGGGACATTGCCTCTGGCTACCACTACGGCGTGG  
ESRRB\_CRISPR4 121 CGCCTGTGCCTCGTGTGCGGGGACATTGCCTCTGGCTACCACTACGGCGTGG

## **GPR135**

GPR135\_WT 1 GGAAAGCGTCCACATTCCCTAGTCCGGTAGCCCTCCTCGCGGTTGCGCCCTAGGAGCATCG  
GPR135\_G56R 1 GGAAAGCGTCCACATTCCCTAGTCCGGTAGCCCTCCTCGCGGTTGCGCCCTAGGAGCATCG  
GPR135\_CRISPR2 1 GGAAAGCGTCCACATTCCCTAGTCCGGTAGCCCTCCTCGCGGTTGCGCCCTAGGAGCATCG  
GPR135\_CRISPR3 1 GGAAAGCGTCCACATTCCCTAGTCCGGTAGCCCTCCTCGCGGTTGCGCCCTAGGAGCATCG  
GPR135\_CRISPR4 1 GGAAAGCGTCCACATTCCCTAGTCCGGTAGCCCTCCTCGCGGTTGCGCCCTAGGAGCATCG

GPR135\_WT 61 AAATGTTGGGATTGCGGATGGCGTAGATGACAGGGTTGATGGCCCCATTGGCCCAGGTCA  
GPR135\_G56R 61 AAATGTTGGGATTGCGGATGGCGTAGATGACAGGGTTGATGGCCCCATTGGCCCAGGTCA  
GPR135\_CRISPR2 61 AAATGTTGGGATTGCGGATGGCGTAGATGACAGGGTTGATGGCCCCATTGGCCCAGGTCA  
GPR135\_CRISPR3 61 AAATGTTGGGATTGCGGATGGCGTAGATGACAGGGTTGATGGCCCCATTGGCCCAGGTCA  
GPR135\_CRISPR4 61 AAATGTTGGGATTGCGGATGGCGTAGATGACAGGGTTGATGGCCCCATTGGCCCAGGTCA

|                |     |                                                              |
|----------------|-----|--------------------------------------------------------------|
| GPR135_WT      | 121 | GCCAGACGGCCACCACGCTGAGGAGCGAGGGGGCCTGCATGGTCTGGGCCTGCCGGGCGG |
| GPR135_G56R    | 121 | GCCAGACGGCCACCACGCTGAGGAGCGAGGGGGCCTGCATGGTCTGGGCCTGCCGGGCGG |
| GPR135_CRISPR2 | 121 | GCCAGACGGCCACCACGCTGAGGAGCGAGGGGGCCTGCATGGTCTGGGCCTGCCGGGCGG |
| GPR135_CRISPR3 | 121 | GCCAGACGGCCACCACGCTGAGGAGCGAGGGGGCCTGCATGGTCTGGGCCTGCCGGGCGG |
| GPR135_CRISPR4 | 121 | GCCAGACGGCCACCACGCTGAGGAGCGAGGGGGCCTGCATGGTCTGGGCCTGCCGGGCGG |

|                |     |                                                              |
|----------------|-----|--------------------------------------------------------------|
| GPR135_WT      | 181 | CGGCCAGCAGCACCAGGAAGCAGTAGGGCCCCCAGCAGCAGATGACGAAGACGATCATGA |
| GPR135_G56R    | 181 | CGGCCAGCAGCACCAGGAAGCAGTAGGGCCCCCAGCAGCAGATGACGAAGACGATCATGA |
| GPR135_CRISPR2 | 181 | CGGCCAGCAGCACCAGGAAGCAGTAGGGCCCCCAGCAGCAGATGACGAAGACGATCATGA |
| GPR135_CRISPR3 | 181 | CGGCCAGCAGCACCAGGAAGCAGTAGGGCCCCCAGCAGCAGATGACGAAGACGATCATGA |
| GPR135_CRISPR4 | 181 | CGGCCAGCAGCACCAGGAAGCAGTAGGGCCCCCAGCAGCAGATGACGAAGACGATCATGA |

|                |     |             |
|----------------|-----|-------------|
| GPR135_WT      | 241 | TGAGGACGGTG |
| GPR135_G56R    | 241 | TGAGGACGGTG |
| GPR135_CRISPR2 | 241 | TGAGGACGGTG |
| GPR135_CRISPR3 | 241 | TGAGGACGGTG |
| GPR135_CRISPR4 | 241 | TGAGGACGGTG |

## SOX17

|               |   |                                                             |
|---------------|---|-------------------------------------------------------------|
| SOX17_WT      | 1 | GCGCTGGGCCCCGAGGGCGGCCGCTGGCCATGGACGGCCTGGGCCTCCAGTTCCCCGAG |
| SOX17_G56R    | 1 | GCGCTGGGCCCCGAGGGCGGCCGCTGGCCATGGACGGCCTGGGCCTCCAGTTCCCCGAG |
| SOX17_CRISPR2 | 1 | GCGCTGGGCCCCGAGGGCGGCCGCTGGCCATGGACGGCCTGGGCCTCCAGTTCCCCGAG |
| SOX17_CRISPR3 | 1 | GCGCTGGGCCCCGAGGGCGGCCGCTGGCCATGGACGGCCTGGGCCTCCAGTTCCCCGAG |
| SOX17_CRISPR4 | 1 | GCGCTGGGCCCCGAGGGCGGCCGCTGGCCATGGACGGCCTGGGCCTCCAGTTCCCCGAG |

|               |    |                                                               |
|---------------|----|---------------------------------------------------------------|
| SOX17_WT      | 61 | CAGGGCTTCCCCGCCGGCCCCGCCGCTGCTGCCTCCGCACATGGGCGGCCACTACCGCGAC |
| SOX17_G56R    | 61 | CAGGGCTTCCCCGCCGGCCCCGCCGCTGCTGCCTCCGCACATGGGCGGCCACTACCGCGAC |
| SOX17_CRISPR2 | 61 | CAGGGCTTCCCCGCCGGCCCCGCCGCTGCTGCCTCCGCACATGGGCGGCCACTACCGCGAC |
| SOX17_CRISPR3 | 61 | CAGGGCTTCCCCGCCGGCCCCGCCGCTGCTGCCTCCGCACATGGGCGGCCACTACCGCGAC |
| SOX17_CRISPR4 | 61 | CAGGGCTTCCCCGCCGGCCCCGCCGCTGCTGCCTCCGCACATGGGCGGCCACTACCGCGAC |

|               |     |          |
|---------------|-----|----------|
| SOX17_WT      | 121 | TGCCAGAG |
| SOX17_G56R    | 121 | TGCCAGAG |
| SOX17_CRISPR2 | 121 | TGCCAGAG |

SOX17\_CRISPR3 121 TGCCAGAG  
SOX17\_CRISPR4 121 TGCCAGAG

### **RP1-37C10.3**

RP1\_WT 1 GGTGCAGAACCCCCAGCCTGGGTGATGTCACGGCCCCTTCAGTGCTGCCTTTCTGGGATC  
RP1\_G56R 1 GGTGCAGAACCCCCAGCCTGGGTGATGTCACGGCCCCTTCAGTGCTGCCTTTCTGGGATC  
RP1\_CRISPR2 1 GGTGCAGAACCCCCAGCCTGGGTGATGTCACGGCCCCTTCAGTGCTGCCTTTCTGGGATC  
RP1\_CRISPR3 1 GGTGCAGAACCCCCAGCCTGGGTGATGTCACGGCCCCTTCAGTGCTGCCTTTCTGGGATC  
RP1\_CRISPR4 1 GGTGCAGAACCCCCAGCCTGGGTGATGTCACGGCCCCTTCAGTGCTGCCTTTCTGGGATC

RP1\_WT 61 CAGAGGAGCCCCCTCAGGCTTCACTCTCGTGCTTCCTGCTGCTGCAAATAGCCCGGGTCT  
RP1\_G56R 61 CAGAGGAGCCCCCTCAGGCTTCACTCTCGTGCTTCCTGCTGCTGCAAATAGCCCGGGTCT  
RP1\_CRISPR2 61 CAGAGGAGCCCCCTCAGGCTTCACTCTCGTGCTTCCTGCTGCTGCAAATAGCCCGGGTCT  
RP1\_CRISPR3 61 CAGAGGAGCCCCCTCAGGCTTCACTCTCGTGCTTCCTGCTGCTGCAAATAGCCCGGGTCT  
RP1\_CRISPR4 61 CAGAGGAGCCCCCTCAGGCTTCACTCTCGTGCTTCCTGCTGCTGCAAATAGCCCGGGTCT

RP1\_WT 121 CGTGAGCCTGTGATGCAC  
RP1\_G56R 121 CGTGAGCCTGTGATGCAC  
RP1\_CRISPR2 121 CGTGAGCCTGTGATGCAC  
RP1\_CRISPR3 121 CGTGAGCCTGTGATGCAC  
RP1\_CRISPR4 121 CGTGAGCCTGTGATGCAC

### **NPEPL1/STX16-NPEPL1**

NPELP1\_WT 1 GGGTTGCTCCGGCCGGGCCTCTCCACCCTGCCCATCGCCTGTCACTATTGCTGTCTGCA  
NPELP1\_G56R 1 GGGTTGCTCCGGCCGGGCCTCTCCACCCTGCCCATCGCCTGTCACTATTGCTGTCTGCA  
NPELP1\_CRISPR2 1 GGGTTGCTCCGGCCGGGCCTCTCCACCCTGCCCATCGCCTGTCACTATTGCTGTCTGCA  
NPELP1\_CRISPR3 1 GGGTTGCTCCGGCCGGGCCTCTCCACCCTGCCCATCGCCTGTCACTATTGCTGTCTGCA  
NPELP1\_CRISPR4 1 GGGTTGCTCCGGCCGGGCCTCTCCACCCTGCCCATCGCCTGTCACTATTGCTGTCTGCA

NPELP1\_WT 61 AGGAGCTCGGGGTGGCTGGGAGGGAGCGTGTGGGGAGGCAGCAGAAGCTGGGCTGGGAGG  
NPELP1\_G56R 61 AGGAGCTCGGGGTGGCTGGGAGGGAGCGTGTGGGGAGGCAGCAGAAGCTGGGCTGGGAGG  
NPELP1\_CRISPR2 61 AGGAGCTCGGGGTGGCTGGGAGGGAGCGTGTGGGGAGGCAGCAGAAGCTGGGCTGGGAGG

NPPEL1\_CRISPR3 61 AGGAGCTCGGGGTGGCTGGGAGGGAGCGTGTGGGGAGGCAGCAGAAGCTGGGCTGGGAGG  
NPPEL1\_CRISPR4 61 AGGAGCTCGGGGTGGCTGGGAGGGAGCGTGTGGGGAGGCAGCAGAAGCTGGGCTGGGAGG

### **TSPAN4**

TSPAN4\_WT 1 ACCTTGTCCTGTAGGCGAAGAAGAGGATGGCGATGGTGGCCTCCAGCAGGAACACCAGC  
TSPAN4\_G56R 1 ACCTTGTCCTGTAGGCGAAGAAGAGGATGGCGATGGTGGCCTCCAGCAGGAACACCAGC  
TSPAN4\_CRISPR2 1 ACCTTGTCCTGTAGGCGAAGAAGAGGATGGCGATGGTGGCCTCCAGCAGGAACACCAGC  
TSPAN4\_CRISPR3 1 ACCTTGTCCTGTAGGCGAAGAAGAGGATGGCGATGGTGGCCTCCAGCAGGAACACCAGC  
TSPAN4\_CRISPR4 1 ACCTTGTCCTGTAGGCGAAGAAGAGGATGGCGATGGTGGCCTCCAGCAGGAACACCAGC

TSPAN4\_WT 61 AGCAGCAGCAGGAAGAAGACTGTGGAGGGGGCAGGCTCAGACAGGGACCCGAAAGGCCGCAC  
TSPAN4\_G56R 61 AGCAGCAGCAGGAAGAAGACTGTGGAGGGGGCAGGCTCAGACAGGGACCCGAAAGGCCGCAC  
TSPAN4\_CRISPR2 61 AGCAGCAGCAGGAAGAAGACTGTGGAGGGGGCAGGCTCAGACAGGGACCCGAAAGGCCGCAC  
TSPAN4\_CRISPR3 61 AGCAGCAGCAGGAAGAAGACTGTGGAGGGGGCAGGCTCAGACAGGGACCCGAAAGGCCGCAC  
TSPAN4\_CRISPR4 61 AGCAGCAGCAGGAAGAAGACTGTGGAGGGGGCAGGCTCAGACAGGGACCCGAAAGGCCGCAC

TSPAN4\_WT 121 AGCCTCCGCCCCACAGCATGCCAGGGGCCA  
TSPAN4\_G56R 121 AGCCTCCGCCCCACAGCATGCCAGGGGCCA  
TSPAN4\_CRISPR2 121 AGCCTCCGCCCCACAGCATGCCAGGGGCCA  
TSPAN4\_CRISPR3 121 AGCCTCCGCCCCACAGCATGCCAGGGGCCA  
TSPAN4\_CRISPR4 121 AGCCTCCGCCCCACAGCATGCCAGGGGCCA

### **SLC39A4**

SLC39A4\_WT 1 TAGGTTTGTGAGGTGTGGGATCTTAAGTCAAAGGTGGGGGACTAGGGCAGGGTATCAGAA  
SLC39A4\_G56R 1 TAGGTTTGTGAGGTGTGGGATCTTAAGTCAAAGGTGGGGGACTAGGGCAGGGTATCAGAA  
SLC39A4\_CRISPR2 1 TAGGTTTGTGAGGTGTGGGATCTTAAGTCAAAGGTGGGGGACTAGGGCAGGGTATCAGAA  
SLC39A4\_CRISPR3 1 TAGGTTTGTGAGGTGTGGGATCTTAAGTCAAAGGTGGGGGACTAGGGCAGGGTATCAGAA  
SLC39A4\_CRISPR4 1 TAGGTTTGTGAGGTGTGGGATCTTAAGTCAAAGGTGGGGGACTAGGGCAGGGTATCAGAA

SLC39A4\_WT 61 GGTGATGTCATCCTCGTACAGGGACAGCAGCAGCAGGACGGTCCAGCCGCCAGCAGGCC  
SLC39A4\_G56R 61 GGTGATGTCATCCTCGTACAGGGACAGCAGCAGCAGGACGGTCCAGCCGCCAGCAGGCC  
SLC39A4\_CRISPR2 61 GGTGATGTCATCCTCGTACAGGGACAGCAGCAGCAGGACGGTCCAGCCGCCAGCAGGCC



SLC39A4\_CRISPR3 61 GGTGATGTCATCCTCGTACAGGGACAGCAGCAGCAGGACGGTCCAGCCGCCAGCAGGCC  
SLC39A4\_CRISPR4 61 GGTGATGTCATCCTCGTACAGGGACAGCAGCAGCAGGACGGTCCAGCCGCCAGCAGGCC

### **TBX5-AS1**

TBX5\_WT 1 CAGTCCAGGCAACTTTTTCTTTGCCTGGGGCCATTTCTTCTAAATGGAAGGAGAAAAGT  
TBX5\_G56R 1 CAGTCCAGGCAACTTTTTCTTTGCCTGGGGCCATTTCTTCTAAATGGAAGGAGAAAAGT  
TBX5\_CRISPR2 1 CAGTCCAGGCAACTTTTTCTTTGCCTGGGGCCATTTCTTCTAAATGGAAGGAGAAAAGT  
TBX5\_CRISPR3 1 CAGTCCAGGCAACTTTTTCTTTGCCTGGGGCCATTTCTTCTAAATGGAAGGAGAAAAGT  
TBX5\_CRISPR4 1 CAGTCCAGGCAACTTTTTCTTTGCCTGGGGCCATTTCTTCTAAATGGAAGGAGAAAAGT

TBX5\_WT 61 CTGAGCATTAGAAATTGTGGCATTAAATGTCTGCAAGGGCTAATGGAGTGAAAAGAATACA  
TBX5\_G56R 61 CTGAGCATTAGAAATTGTGGCATTAAATGTCTGCAAGGGCTAATGGAGTGAAAAGAATACA  
TBX5\_CRISPR2 61 CTGAGCATTAGAAATTGTGGCATTAAATGTCTGCAAGGGCTAATGGAGTGAAAAGAATACA  
TBX5\_CRISPR3 61 CTGAGCATTAGAAATTGTGGCATTAAATGTCTGCAAGGGCTAATGGAGTGAAAAGAATACA  
TBX5\_CRISPR4 61 CTGAGCATTAGAAATTGTGGCATTAAATGTCTGCAAGGGCTAATGGAGTGAAAAGAATACA

TBX5\_WT 121 TTATTCTCCTTTTCTTCTTAGAAAAAATTT  
TBX5\_G56R 121 TTATTCTCCTTTTCTTCTTAGAAAAAATTT  
TBX5\_CRISPR2 121 TTATTCTCCTTTTCTTCTTAGAAAAAATTT  
TBX5\_CRISPR3 121 TTATTCTCCTTTTCTTCTTAGAAAAAATTT  
TBX5\_CRISPR4 121 TTATTCTCCTTTTCTTCTTAGAAAAAATTT

### **FAM69B/SNHG7**

FAM69B\_WT 1 TGGCCCGCCAAGGCCACGCAGGCCCCAGCCACTGCTGGAGAGCACCCCTGCAGGGCAGGCG  
FAM69B\_G56R 1 TGGCCCGCCAAGGCCACGCAGGCCCCAGCCACTGCTGGAGAGCACCCCTGCAGGGCAGGCG  
FAM69B\_CRISPR2 1 TGGCCCGCCAAGGCCACGCAGGCCCCAGCCACTGCTGGAGAGCACCCCTGCAGGGCAGGCG  
FAM69B\_CRISPR3 1 TGGCCCGCCAAGGCCACGCAGGCCCCAGCCACTGCTGGAGAGCACCCCTGCAGGGCAGGCG  
FAM69B\_CRISPR4 1 TGGCCCGCCAAGGCCACGCAGGCCCCAGCCACTGCTGGAGAGCACCCCTGCAGGGCAGGCG  
FAM69B\_Ref 1 TGGCCCGCCAAGGCCACGCAGGCCCCAGCCACTGCTGGAGAGCACCCCTGCAGGGCAGGCG

FAM69B\_WT 61 GCAGCAGTGGGCGCAACAGGGGTGGCAGGGCGGCCCGCTGCCAGGCGCCATGCGGCACGC  
FAM69B\_G56 61 GCAGCAGTGGGCGCAACAGGGGTGGAAGGGCGGCCCGCTGCCAGGCGCCATGCGGCACGC

FAM69B\_CRISPR2 61 GCAGCAGTGGGCGCAACAGGGGTGGAAGGGCGGCCGCGTGCCAGGCGCCATGCGGCACGC  
FAM69B\_CRISPR3 61 GCAGCAGTGGGCGCAACAGGGGTGGAAGGGCGGCCGCGTGCCAGGCGCCATGCGGCACGC  
FAM69B\_CRISPR4 61 GCAGCAGTGGGCGCAACAGGGGTGGAAGGGCGGCCGCGTGCCAGGCGCCATGCGGCACGC  
FAM69B\_Ref 61 GCAGCAGTGGGCGCAACAGGGGTGGAAGGGCGGCCGCGTGCCAGGCGCCATGCGGCACGC

FAM69B\_WT 121 CTTCGGTGAGGTAGAGGTCCCCACAGTAGCCACAGCAGTCTGGAGGCGTGCTCCTTCTCCT  
FAM69B\_G56R 121 CCTCGGTGAGGTAGAGGTCCCCACAGTAGCCACAGCAGTCTGGAGGCGTGCTCCTTCTCCT  
FAM69B\_CRISPR2 121 CCTCGGTGAGGTAGAGGTCCCCACAGTAGCCACAGCAGTCTGGAGGCGTGCTCCTTCTCCT  
FAM69B\_CRISPR3 121 CCTCGGTGAGGTAGAGGTCCCCACAGTAGCCACAGCAGTCTGGAGGCGTGCTCCTTCTCCT  
FAM69B\_CRISPR4 121 CCTCGGTGAGGTAGAGGTCCCCACAGTAGCCACAGCAGTCTGGAGGCGTGCTCCTTCTCCT  
FAM69B\_Ref 121 CCTCGGTGAGGTAGAGGTCCCCACAGTAGCCACAGCAGTCTGGAGGCGTGCTCCTTCTCCT

FAM69B\_WT 181 GCAGGGACAGCAGCAGCAGGAACTCGTTACGCTGCAGCAGGGCCCACACGGACTTGGCTT  
FAM69B\_G56R 181 GCAGGGACAGCAGCAGCAGGAACTCGTTACGCTGCAGCAGGGCCCACACGGACTTGGCTT  
FAM69B\_CRISPR2 181 GCAGGGACAGCAGCAGCAGGAACTCGTTACGCTGCAGCAGGGCCCACACGGACTTGGCTT  
FAM69B\_CRISPR3 181 GCAGGGACAGCAGCAGCAGGAACTCGTTACGCTGCAGCAGGGCCCACACGGACTTGGCTT  
FAM69B\_CRISPR4 181 GCAGGGACAGCAGCAGCAGGAACTCGTTACGCTGCAGCAGGGCCCACACGGACTTGGCTT  
FAM69B\_Ref 181 GCAGGGACAGCAGCAGCAGGAACTCGTTACGCTGCAGCAGGGCCCACACGGACTTGGCTT

FAM69B\_WT 241 CCGCCAGGGAC  
FAM69B\_G56R 241 CCGCCAGGGAC  
FAM69B\_CRISPR2 241 CCGCCAGGGAC  
FAM69B\_CRISPR3 241 CCGCCAGGGAC  
FAM69B\_CRISPR4 241 CCGCCAGGGAC  
FAM69B\_Ref 241 CCGCCAGGGAC

### ***PDLIM7***

PDLIM7\_WT 1 AGGTGGGCGGCCAGGGCCAGGCCAGCAGGAGGCTCAGGCCAGGGGCACGAAAGGGGGGT  
PDLIM7\_G56R 1 AGGTGGGCGGCCAGGGCCAGGCCAGCAGGAGGCTCAGGCCAGGGGCACGAAAGGGGGGT  
PDLIM7\_CRISPR2 1 AGGTGGGCGGCCAGGGCCAGGCCAGCAGGAGGCTCAGGCCAGGGGCACGAAAGGGGGGT  
PDLIM7\_CRISPR3 1 AGGTGGGCGGCCAGGGCCAGGCCAGCAGGAGGCTCAGGCCAGGGGCACGAAAGGGGGGT  
PDLIM7\_CRISPR4 1 AGGTGGGCGGCCAGGGCCAGGCCAGCAGGAGGCTCAGGCCAGGGGCACGAAAGGGGGGT

|                |     |                                                              |
|----------------|-----|--------------------------------------------------------------|
| PDLIM7_WT      | 61  | GAGGTAGGCAGAAGCTGGAGGCACTAAGGGGGTGCCCTGGGCAGGAGGAACAGAAAGAGG |
| PDLIM7_G56R    | 61  | GAGGTAGGCAGAAGCTGGAGGCACTAAGGGGGTGCCCTGGGCAGGAGGAACAGAAAGAGG |
| PDLIM7_CRISPR2 | 61  | GAGGTAGGCAGAAGCTGGAGGCACTAAGGGGGTGCCCTGGGCAGGAGGAACAGAAAGAGG |
| PDLIM7_CRISPR3 | 61  | GAGGTAGGCAGAAGCTGGAGGCACTAAGGGGGTGCCCTGGGCAGGAGGAACAGAAAGAGG |
| PDLIM7_CRISPR4 | 61  | GAGGTAGGCAGAAGCTGGAGGCACTAAGGGGGTGCCCTGGGCAGGAGGAACAGAAAGAGG |
|                |     |                                                              |
| PDLIM7_WT      | 121 | GAGGCAGAGAGGGCAGCCGGCTGGAGAGGGC                              |
| PDLIM7_G56R    | 121 | GAGGCAGAGAGGGCAGCCGGCTGGAGAGGGC                              |
| PDLIM7_CRISPR2 | 121 | GAGGCAGAGAGGGCAGCCGGCTGGAGAGGGC                              |
| PDLIM7_CRISPR3 | 121 | GAGGCAGAGAGGGCAGCCGGCTGGAGAGGGC                              |
| PDLIM7_CRISPR4 | 121 | GAGGCAGAGAGGGCAGCCGGCTGGAGAGGGC                              |

**Figure S2.** Sequencing analysis of the predicted off-targets regions for gRNA1. The top 10 off-target exons predicted by the CRISPOR software were sequenced in the G56R-CRISPR2/3/4 iPSC lines and showed sequences identical to a WT iPSC line. Two silent nucleotide changes in *FAM69B* were detected in the WT clone (indicated in white) as compared to the reference sequence.
